# Supplementary material
Source: HighWire-hosted journal article supplement (http://thorax.bmjjournals.com/highwire/filestream/173921/field_highwire_adjunct_files/1/6210848fige2.pdf)

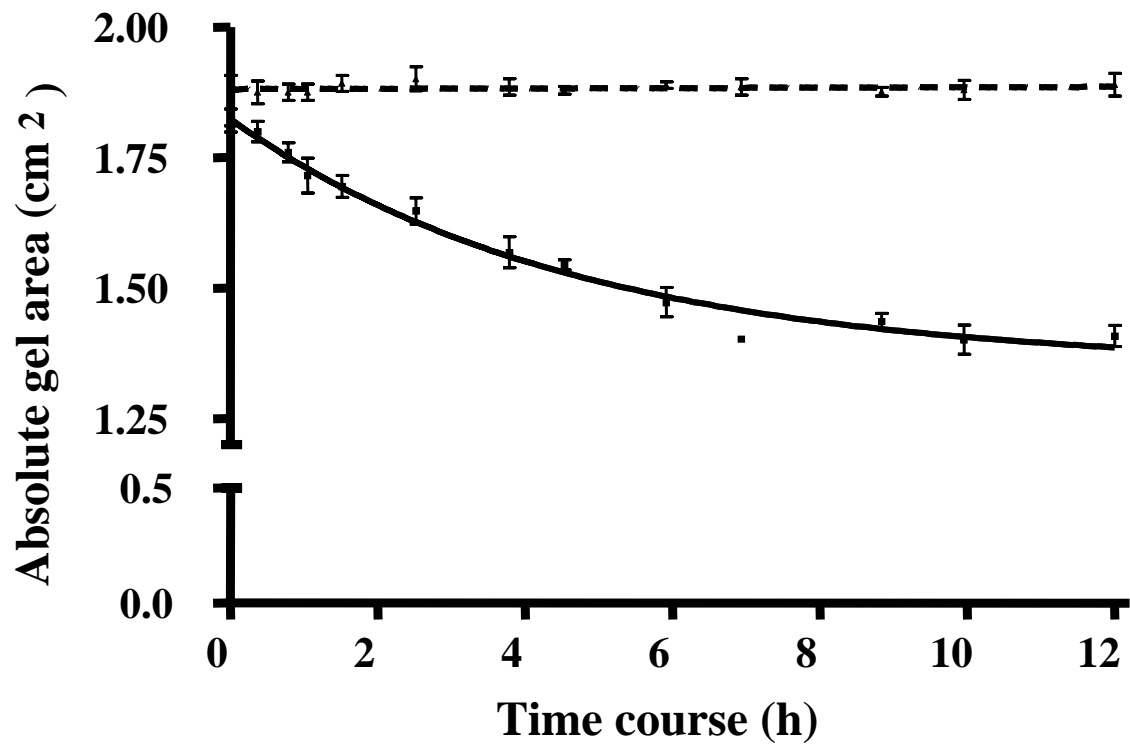

Figure E2

Supplement: 6210848fige2.pdf [file 6210848fige2.pdf]
